# Supplementary material for: Development and Validation of a Hypertension Prediction Model for Community-Dwelling Older Adults Using Routine Health Examination Data: Focus on Clinical Utility and Geriatric Relevance
Source: Research Square preprint supplement (doi:10.21203/rs.3.rs-8072755/v1), 2025-12-22
Supplement: Supplementary file 1 [file 15d45f040e585f94a35d541b.docx]

Supplementary Table 2. Sensitivity analysis comparing model performance between imputed and complete-case datasets

| Performance Metric | Imputed Dataset (n = 10,639) | Complete-case Dataset (n = 3,682) | Difference |
| --- | --- | --- | --- |
| AUC (95% CI) | 0.6382 (0.6214–0.6550) | 0.621 (0.602–0.640) | 0.0172 |
| Sensitivity | 0.682 | 0.671 | 0.011 |
| Specificity | 0.564 | 0.558 | 0.006 |
| PPV | 0.663 | 0.654 | 0.009 |
| NPV | 0.585 | 0.576 | 0.009 |
| Accuracy | 0.629 | 0.621 | 0.008 |
