# Supplementary material for: Development and Validation of a Hypertension Prediction Model for Community-Dwelling Older Adults Using Routine Health Examination Data: Focus on Clinical Utility and Geriatric Relevance
Source: Research Square preprint supplement (doi:10.21203/rs.3.rs-8072755/v1), 2025-12-22
Supplement: Supplementary file 2 [file 89c6695736ba9e0d410f11af.xlsx]

## Sheet: Hypertension Risk Calculator
Hypertension Risk Prediction Calculator for Community-Dwelling Seniors
Developed from data of 10,639 seniors in Jiangling Sub-district, Suzhou, China
Input Parameters
Parameter Name	Input Value	Unit	Description
Age		years	60-98 years, integer
HDL-C		mmol/L	High-density lipoprotein cholesterol (0.5-2.5 mmol/L)
LDL-C		mmol/L	Low-density lipoprotein cholesterol (1.0-5.0 mmol/L)
Calculate Risk
Prediction Results
Result Metric	Value	Unit	Risk Category
Hypertension Risk Probability	Please enter valid parameters		Please enter valid parameters
Sensitivity	68.2	%	Correct prediction rate for hypertension
Specificity	56.4	%	Correct prediction rate for non-hypertension
Positive Predictive Value	66.3	%	Proportion of positive predictions that are actual cases
Risk Category Interpretation
Risk Category	Probability Range	Recommended Actions	Clinical Significance
Low Risk	< 20%	Annual routine health check	Low risk of hypertension, routine monitoring sufficient
Moderate Risk	20% - 50%	BP monitoring every 6 months, lifestyle intervention	Moderate risk, enhanced monitoring and prevention needed
High Risk	> 50%	Monthly BP monitoring, consider preventive medication	High risk, active intervention required
Model Information
Metric	Value	Description
AUC	0.6382	Moderate discriminative ability	95% CI: 0.6214-0.6550
Sample Size	10,639	Community-dwelling seniors	Age 60-98 years
Hypertension Prevalence	57.38%	Study population prevalence	Consistent with epidemiological data
Model Type	Logistic Regression	High interpretability	Suitable for clinical application

## Sheet: User Instructions
Hypertension Risk Prediction Calculator - User Instructions
1. How to Use
1.1 Enter Parameters in the "Hypertension Risk Calculator" worksheet:
• Age: 60-98 years (integer)
• HDL-C: High-density lipoprotein cholesterol (0.5-2.5 mmol/L)
• LDL-C: Low-density lipoprotein cholesterol (1.0-5.0 mmol/L)
1.2 After entering parameters, the calculator will automatically display:
• Hypertension risk probability
• Risk category (Low/Moderate/High Risk)
• Model performance metrics
2. Important Notes
2.1 This calculator is specifically designed for community-dwelling seniors aged ≥60 years
2.2 Not suitable for hospitalized patients or those with secondary hypertension
2.3 Predictions are for reference only and cannot replace professional medical diagnosis
2.4 Recommended to update health data regularly for re-evaluation
3. Risk Categories and Clinical Recommendations
Low Risk (<20%): Annual routine health check
Moderate Risk (20%-50%): BP monitoring every 6 months, lifestyle intervention
High Risk (>50%): Monthly BP monitoring, consider preventive medication
4. Model Performance
• AUC: 0.6382 (95% CI: 0.6214-0.6550)
• Sensitivity: 68.2%, Specificity: 56.4%
• Developed from 10,639 community-dwelling seniors
5. Contact Information
For questions or feedback, please contact:
Corresponding Author: Huan Du
Institution: Department of Rehabilitation Medicine, Suzhou Ninth People's Hospital
Email: xykk@qq.com
Phone: +86-13063866027
