# Supplementary material for: Development and Validation of a Hypertension Prediction Model for Community-Dwelling Older Adults Using Routine Health Examination Data: Focus on Clinical Utility and Geriatric Relevance
Source: Research Square preprint supplement (doi:10.21203/rs.3.rs-8072755/v1), 2025-12-22
Supplement: Supplementary file 3 [file bae8391723dc9223740a921b.docx]

**Supplementary Table 1. Missing data rates for all variables**

| Variable | Missing Count | Missing Rate (%) |
| --- | --- | --- |
| Age | 0 | 0.0 |
| Gender | 0 | 0.0 |
| Height | 128 | 1.2 |
| Weight | 128 | 1.2 |
| Waist circumference | 256 | 2.4 |
| Left SBP | 245 | 2.3 |
| Left DBP | 245 | 2.3 |
| Right SBP | 301 | 2.8 |
| Right DBP | 301 | 2.8 |
| Fasting glucose | 456 | 4.3 |
| Total cholesterol | 387 | 3.6 |
| Triglycerides | 412 | 3.9 |
| LDL-C | 523 | 4.9 |
| HDL-C | 489 | 4.6 |
| HbA1c | 6,991 | 65.7 |
| CEA | 2,789 | 26.2 |
| AFP | 3,124 | 29.4 |
| CA199 | 2,987 | 28.1 |
